# Supplementary material for: Pediatric Trauma and Trauma Team Activation in a Swiss Pediatric Emergency Department: An Observational Cohort Study
Source: MDPI journal article supplement (doi:10.3390/children10081377), 2023-08-11
Supplement: s1 [file s1]

Supplementary Table S1. Lifesaving interventions in the trauma bay 2018-2019.

| <b>Lifesaving interventions</b>        | <b>n</b>             |
|----------------------------------------|----------------------|
| Advanced airway management             | 2 (both intubations) |
| Cardiopulmonary resuscitation          | 1                    |
| Central line placement                 | 0                    |
| Chest drain insertion                  | 2                    |
| Laparotomy and thoracotomy             | 1                    |
| Intraosseous line placement            | 1                    |
| Massive transfusion protocol activated | 0                    |
